# Supplementary material for: Pyranopyrazole based Schiff base for rapid colorimetric detection of arginine in aqueous and real samples
Source: Royal Society of Chemistry journal article supplement (doi:10.1039/d2ra00091a), 2022-01-01
Supplement: d2ra00091a1.pdf [file d2ra00091a1.pdf]

## Pyrano-pyrazole based Schiff Base for Rapid Colorimetric Detection of Arginine in aqueous and Real Samples

### Contents

**Scheme S1:** Synthetic Route to precursors

**Scheme S2:** Synthetic Route to compound **4**

**Figure S1:**  $^1\text{H}$  NMR spectrum of **2** in  $\text{DMSO-}d_6$

**Figure S2:**  $^{13}\text{C}$  NMR spectrum of **2** in  $\text{DMSO-}d_6$

**Figure S3:**  $^1\text{H}$  NMR spectrum of **3** in  $\text{DMSO-}d_6$

**Figure S4:**  $^{13}\text{C}$  NMR spectrum of **3** in  $\text{DMSO-}d_6$

**Figure S5:**  $^1\text{H}$  NMR spectrum of **PPS** in  $\text{DMSO-}d_6$

**Figure S6:**  $^{13}\text{C}$  NMR spectrum of **PPS** in  $\text{DMSO-}d_6$

**Figure S7:**  $^1\text{H}$  NMR titration experiment of **PPS** with different equiv. of Arginine in  $\text{DMSO-}d_6$

**Scheme S3:** Plausible binding mechanism of complex formation between **PPS** and arginine.

**Figure S8:** Optimized geometries of **PPS** and **PPS-Arginine**

**Figure S9:** Pictorial representation of different MO's of **PPS**

**Figure S10:** Pictorial representation of different MO's of **PPS-Arginine**

**Table S1:** Parameters obtained from the TD-DFT calculations. ( $f$  = oscillator strength)

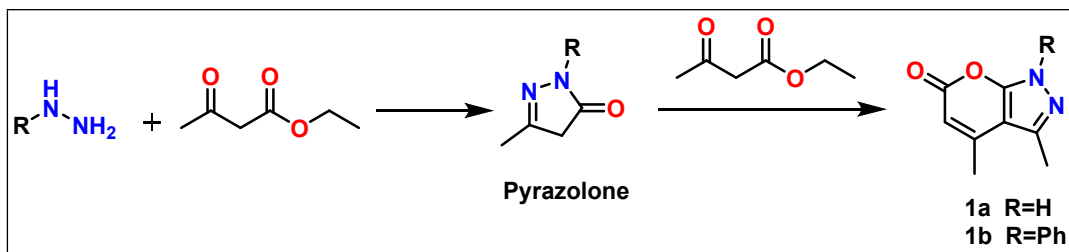

**Scheme S1:** Synthetic Route to precursors **1a** and **1b**

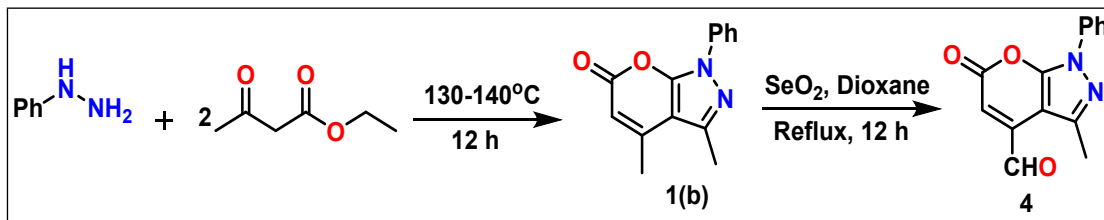

**Scheme S2:** Synthetic Route to compound **4**

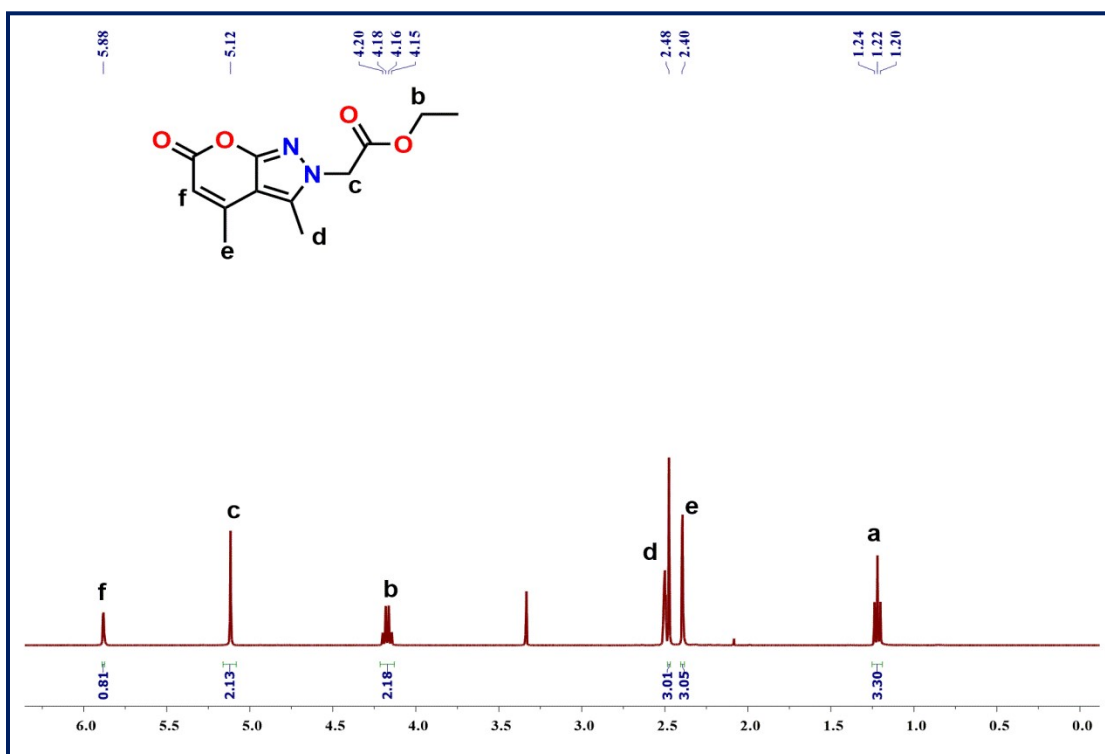

**Figure S1:**  $^1\text{H}$  NMR of **2** in  $\text{DMSO-}d_6$

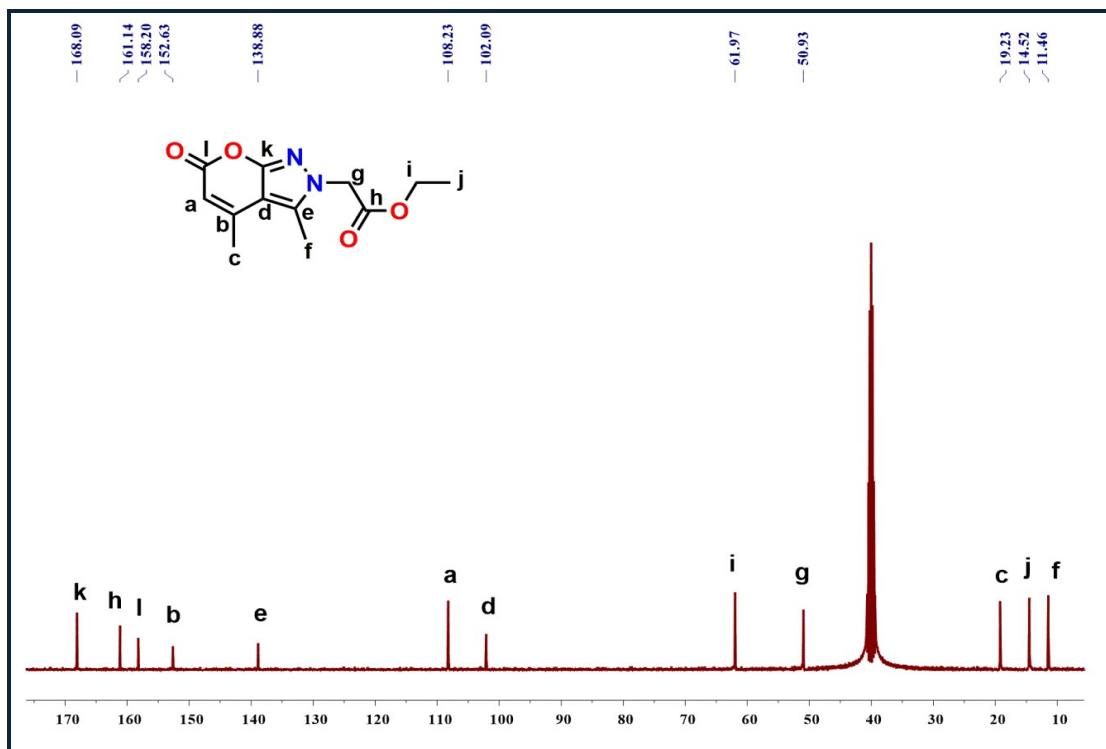

Figure S2:  $^{13}\text{C}$  NMR of 2 in  $\text{DMSO-}d_6$

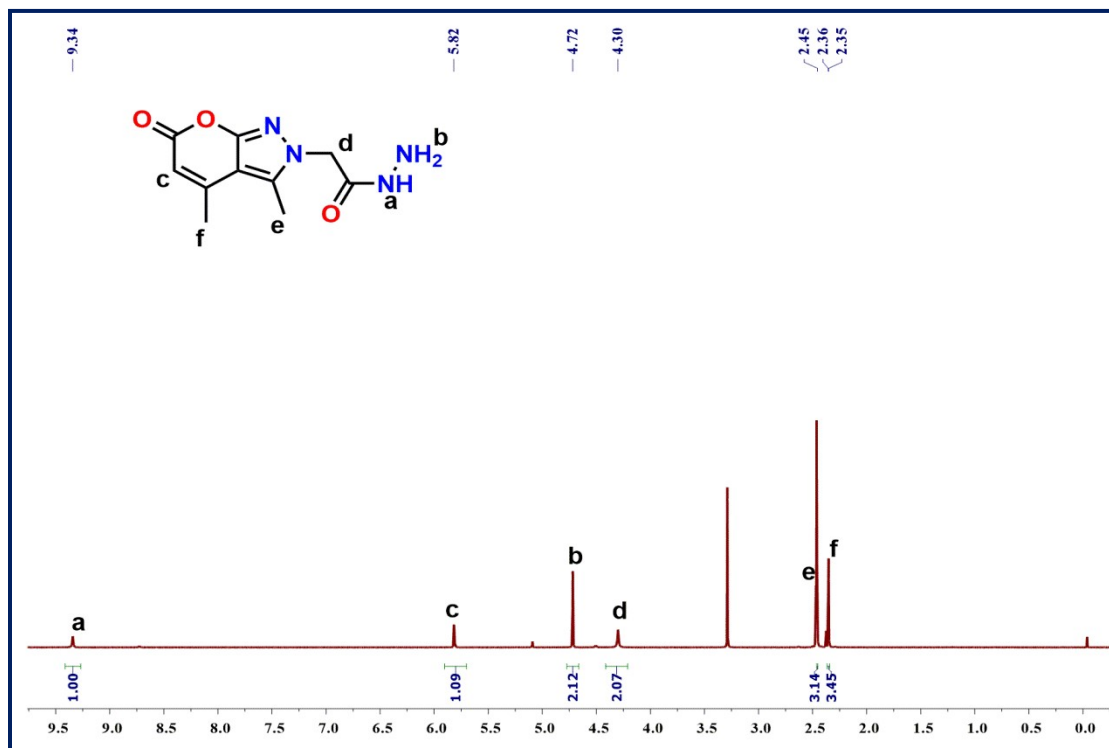

Figure S3:  $^1\text{H}$  NMR of 3 in  $\text{DMSO-}d_6$

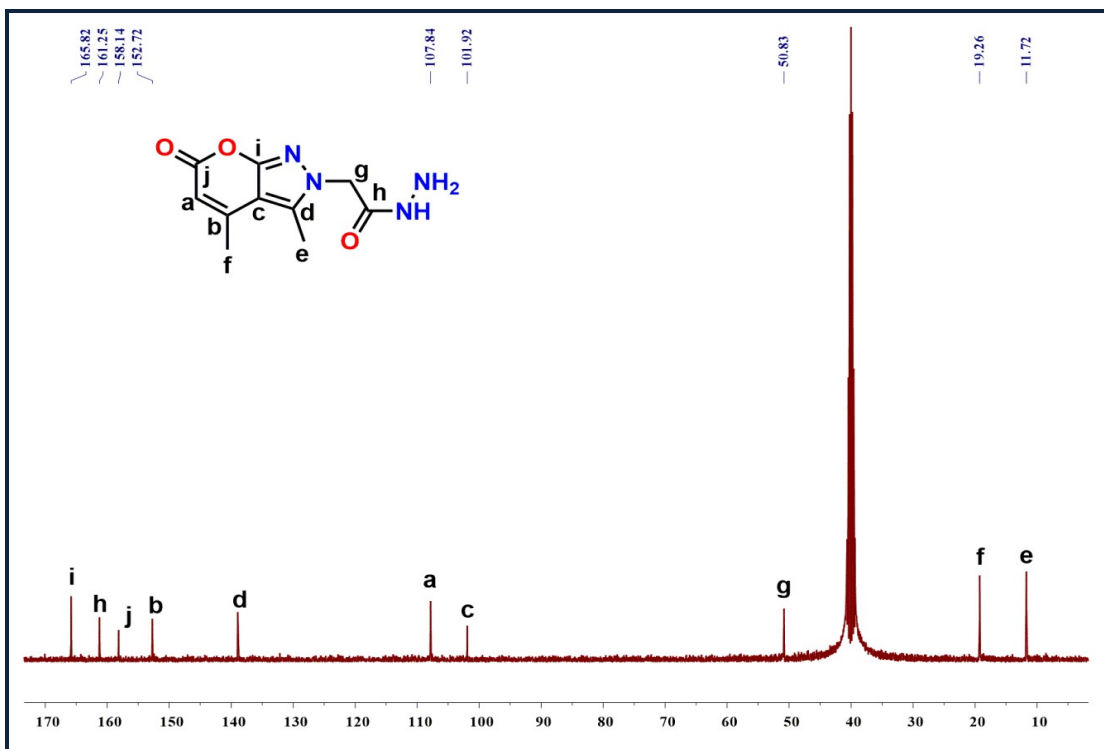

Figure S4:  $^{13}\text{C}$  NMR of 3 in  $\text{DMSO-}d_6$

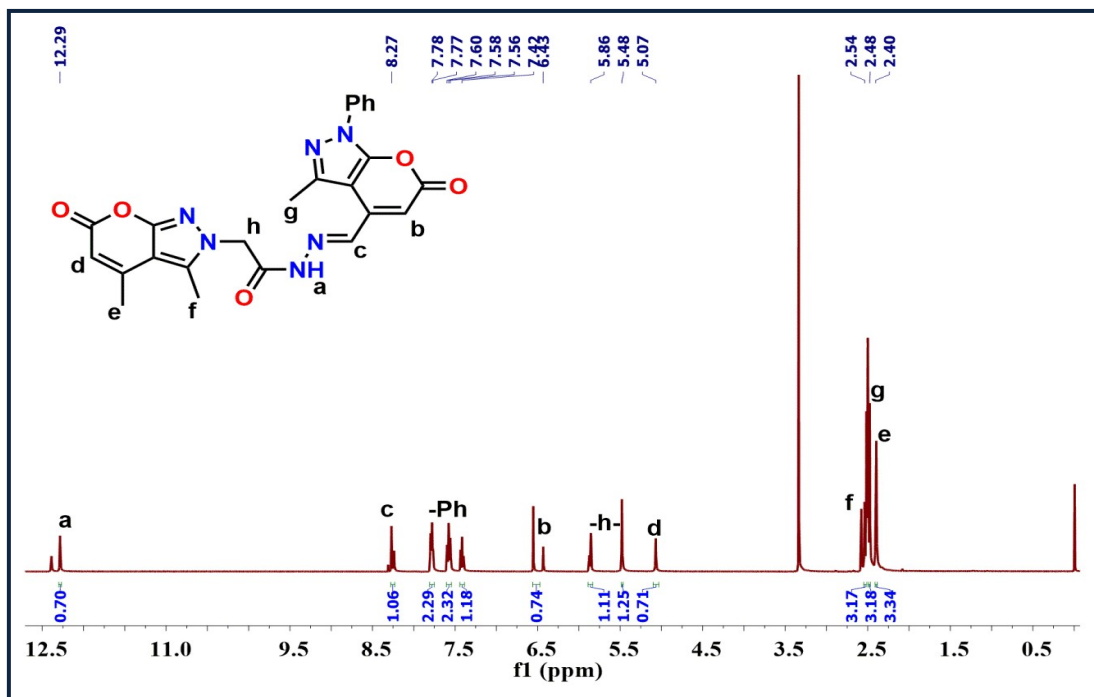

Figure S5:  $^1\text{H}$  NMR spectrum of PPS in  $\text{DMSO-}d_6$

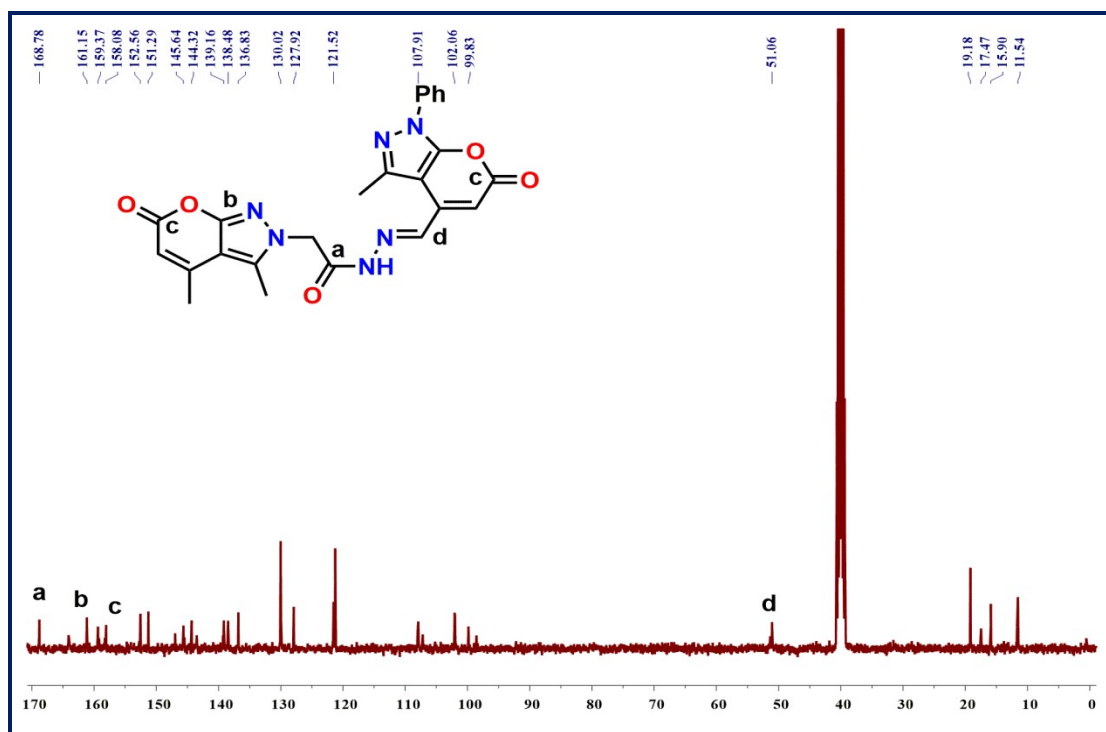

**Figure S6:**  $^{13}\text{C}$  NMR spectrum of **PPS** in  $\text{DMSO-}d_6$

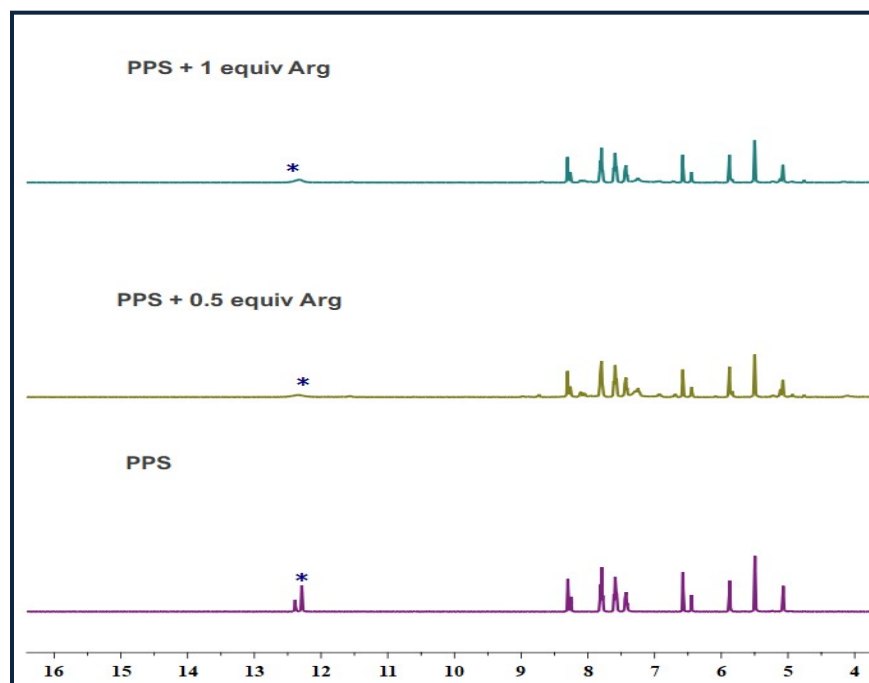

**Figure S7:**  $^1\text{H}$  NMR titration experiment of **PPS** with different equiv. of Arginine in  $\text{DMSO-}d_6$

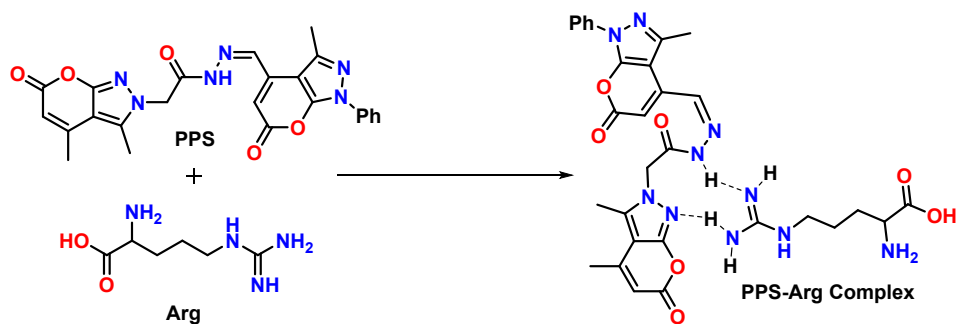

**Scheme S3:** Plausible binding mechanism of PPS-arginine complex formation

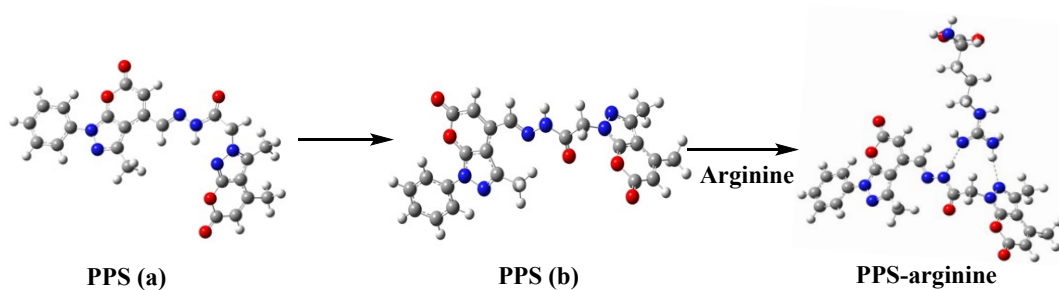

**Figure S8:** Optimized geometries of PPS and PPS-Arginine

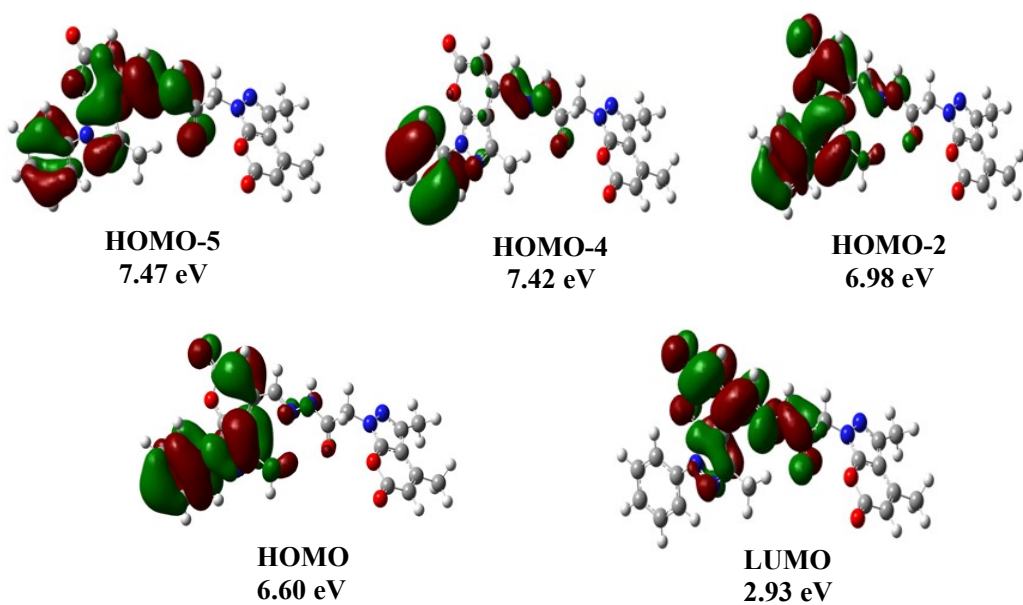

**Figure S9:** Pictorial representation of different MO's of PPS

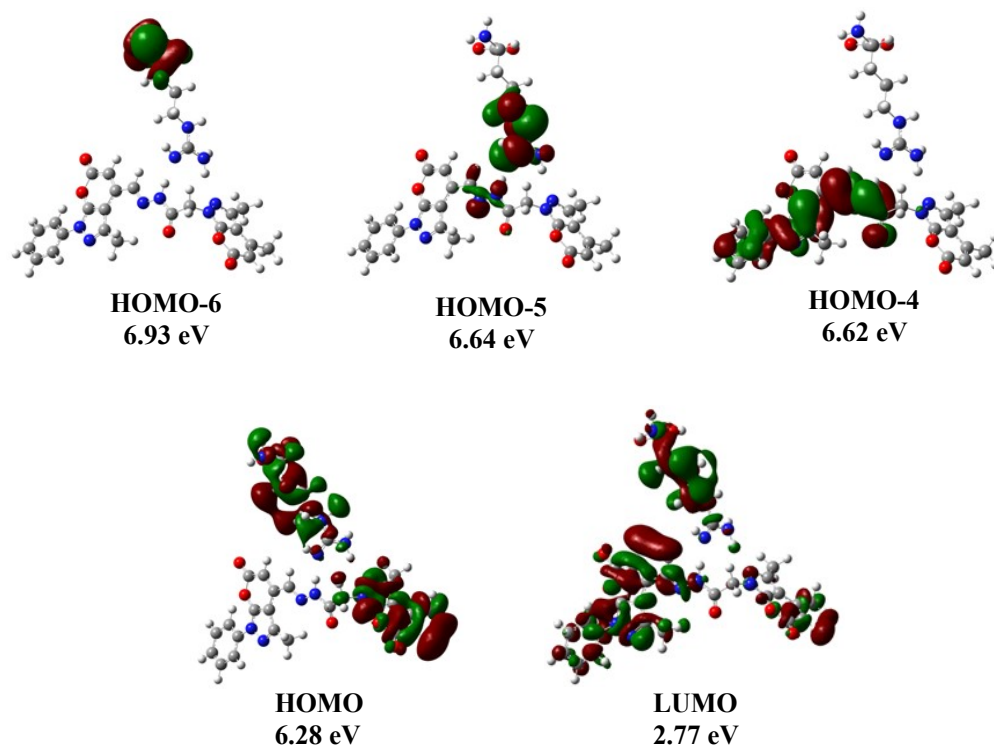

**Figure S10:** Pictorial representation of different MO's of PPS-Arginine

**Table S1:** Parameters obtained from the TD-DFT calculations. ( $f$  = oscillator strength)

|                            | Experimental<br>$\lambda_{\max}$ Values | TD-DFT                                                   |                                                          |                                                        |
|----------------------------|-----------------------------------------|----------------------------------------------------------|----------------------------------------------------------|--------------------------------------------------------|
|                            |                                         | Transition-1                                             | Transition-2                                             | Transition-3                                           |
| Ligand                     | 310 nm                                  | 303.35 nm /<br>4.08 eV<br>HOMO-5 to LUMO<br>$f = 0.9423$ | 343.69 nm /<br>3.60 eV<br>HOMO-2 to LUMO<br>$f = 0.1312$ |                                                        |
| Ligand-Arginine<br>Complex | 315 nm, 363 nm<br>and 402 nm            | 319.04 nm /<br>3.89 eV<br>HOMO-5 to LUMO<br>$f = 0.1814$ | 349.56 nm /<br>3.54 eV<br>HOMO-2 to LUMO<br>$f = 0.1381$ | 382.04 nm /<br>3.25 eV<br>HOMO to LUMO<br>$f = 0.0682$ |
